# Supplementary material for: Acidic nanomaterials (TiO2, ZrO2, and Al2O3) are coke storage components that reduce the deactivation of the Pt–Sn/γ-Al2O3 catalyst in propane dehydrogenation
Source: Royal Society of Chemistry journal article supplement (doi:10.1039/d0cy00735h), 2020-01-01
Supplement: d0cy00735h1.pdf [file d0cy00735h1.pdf]

## Supporting information

### Acidic nanomaterials ( $\text{TiO}_2$ , $\text{ZrO}_2$ , and $\text{Al}_2\text{O}_3$ ) are coke storage components that reduce deactivation of Pt-Sn/ $\gamma\text{-Al}_2\text{O}_3$ catalyst in propane dehydrogenation

Adisak Guntida <sup>a</sup>, Sippakorn Wannakao <sup>b</sup>, Piyasan Praserttham <sup>a,\*</sup> and Joongjai Panpranot <sup>a</sup>

<sup>a</sup> Center of Excellence on Catalysis and Catalytic Reaction Engineering, Department of Chemical Engineering, Faculty of Engineering, Chulalongkorn University, Bangkok 10330, Thailand

<sup>b</sup> SCG Chemicals, Co., Ltd., 1 Siam Cement Road, Bangsue, Bangkok 10800, Thailand

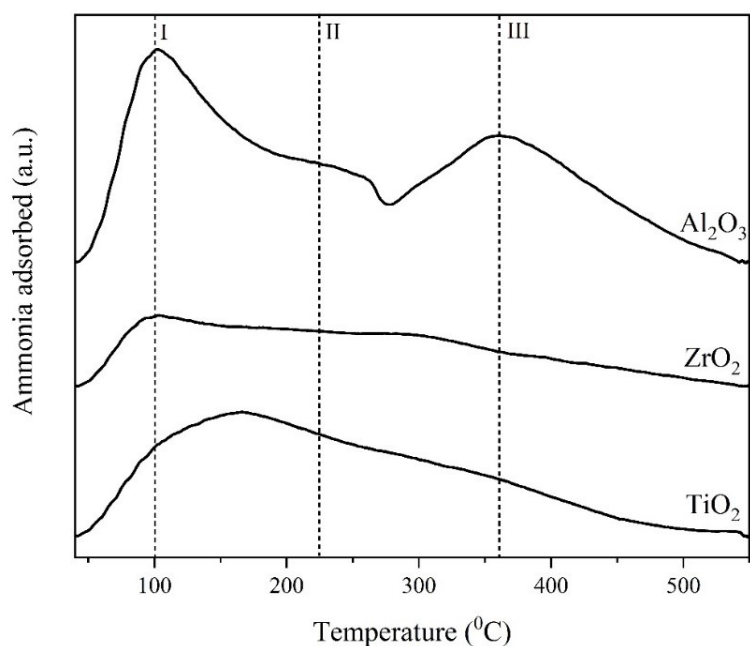

**Fig. S1**  $\text{NH}_3$ -TPD profiles of acidic nanomaterials.

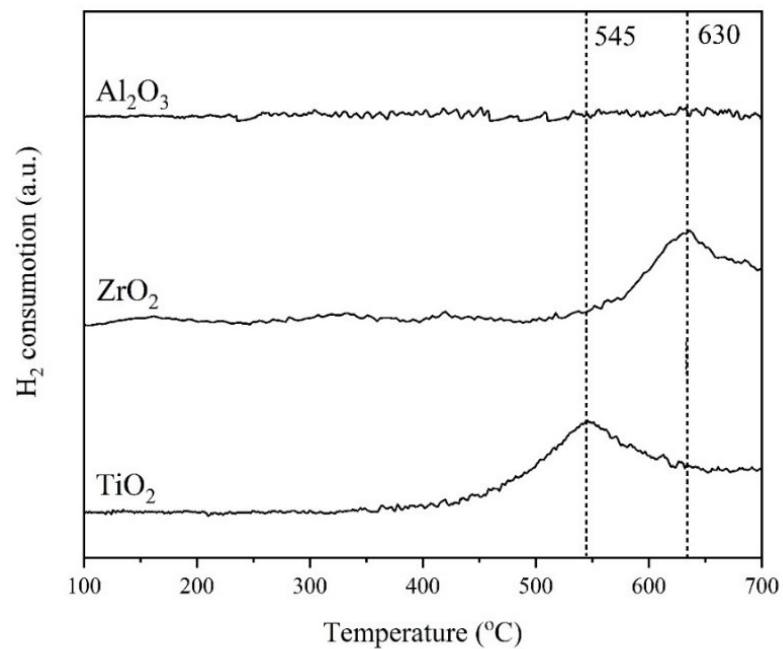

**Fig. S2** H<sub>2</sub>-TPR profiles of acidic nanomaterials.

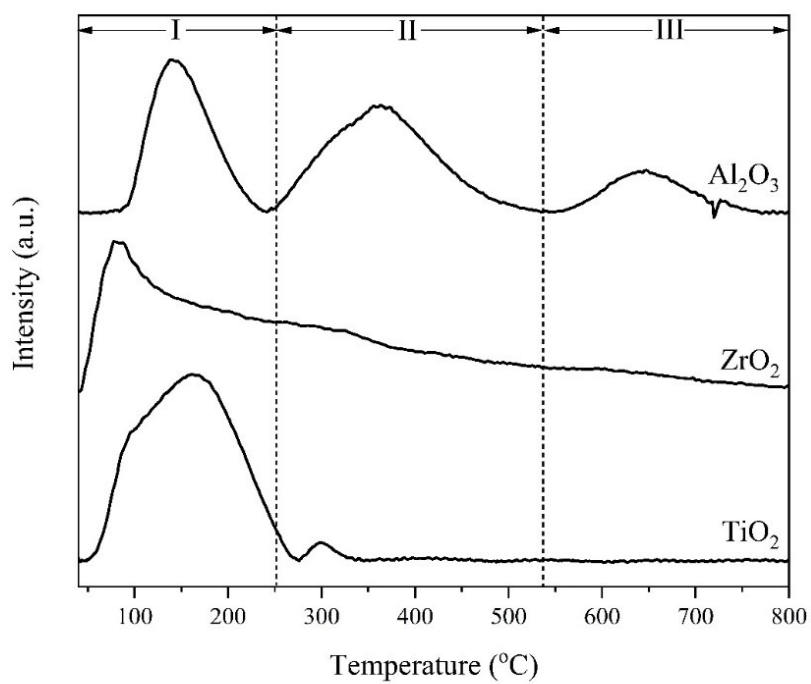

**Fig. S3** O<sub>2</sub>-TPD profiles of acidic nanomaterials.

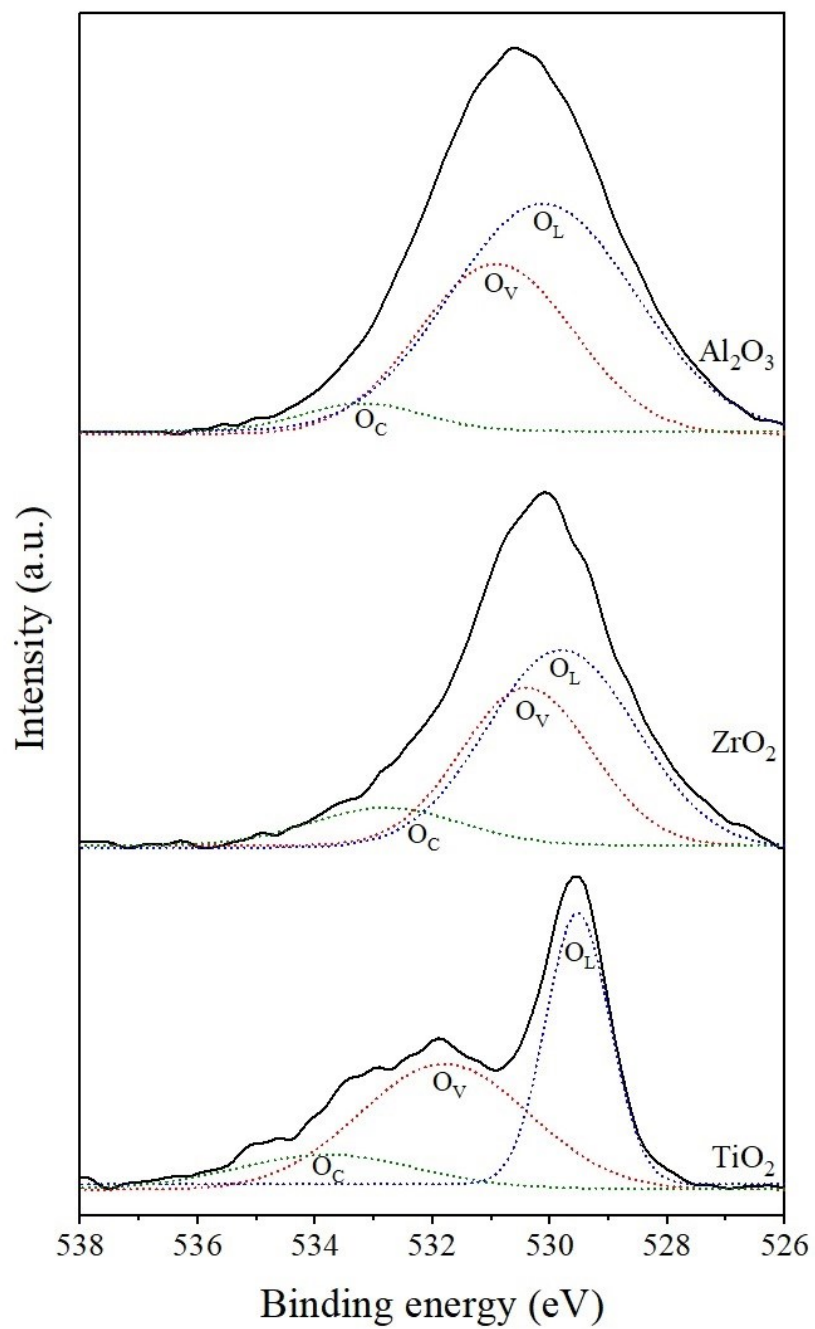

**Fig. S4** O 1s peak in the XPS spectrum of acidic nanomaterials.

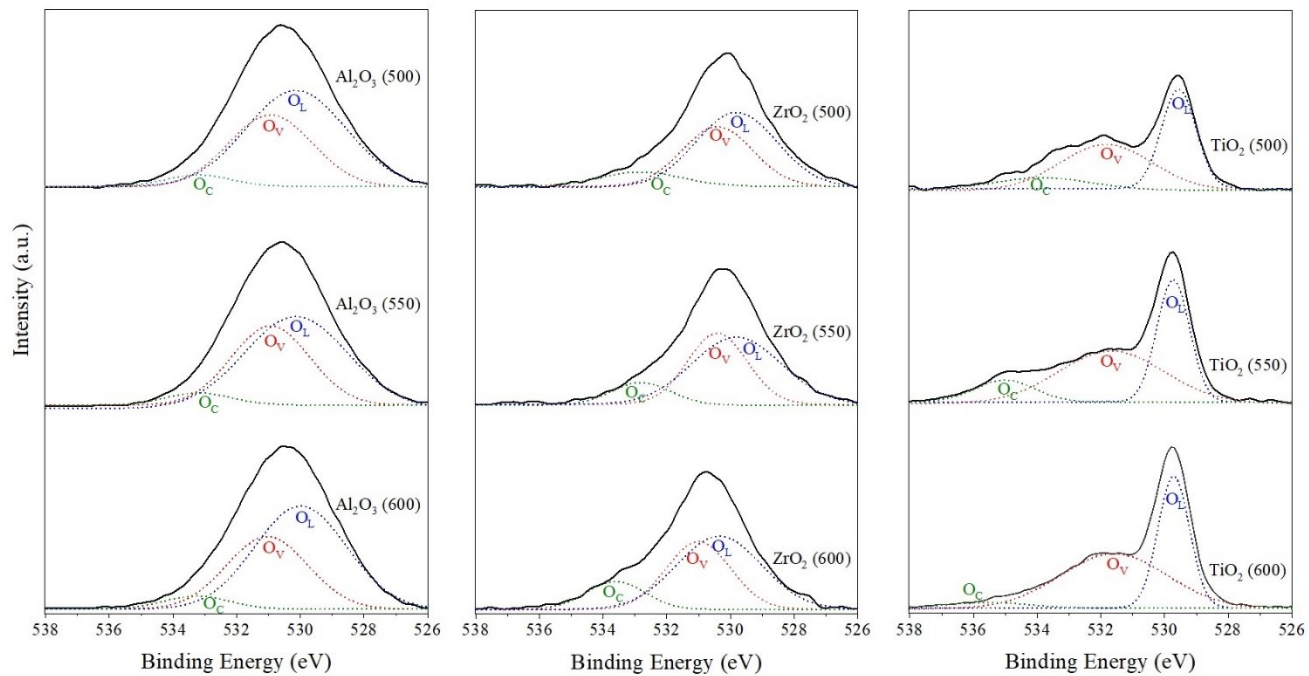

**Fig. S5** O 1s peak in the XPS spectrum of acidic nanomaterials with different temperature of pretreatment.

**Table S1** Summerrized converison and products selectivity during propane dehydrogenation

Initial at 0 h

| Catalysts                                                                        | Conversion (%) | Selectivity (%) |                |                             |                             |                |                             |                             |
|----------------------------------------------------------------------------------|----------------|-----------------|----------------|-----------------------------|-----------------------------|----------------|-----------------------------|-----------------------------|
|                                                                                  |                | C <sub>1</sub>  | C <sub>2</sub> | C <sub>2</sub> <sup>=</sup> | C <sub>3</sub> <sup>=</sup> | C <sub>4</sub> | C <sub>4</sub> <sup>=</sup> | C <sub>5</sub> <sup>+</sup> |
| inert                                                                            | 0.2            | 6.8             | 16.1           | 11.5                        | 40.9                        | 24.8           | 0.0                         | 0.0                         |
| Al <sub>2</sub> O <sub>3</sub>                                                   | 0.8            | 23.1            | 0.8            | 35.5                        | 38.5                        | 0.0            | 2.1                         | 0.0                         |
| ZrO <sub>2</sub>                                                                 | 1.0            | 13.9            | 0.4            | 16.1                        | 69.7                        | 0.0            | 0.0                         | 0.0                         |
| TiO <sub>2</sub>                                                                 | 7.2            | 2.4             | 1.2            | 2.2                         | 93.7                        | 0.1            | 0.5                         | 0.0                         |
| Pt-Sn/ $\gamma$ -Al <sub>2</sub> O <sub>3</sub> + inert                          | 26.2           | 3.4             | 4.8            | 0.4                         | 82.9                        | 3.0            | 4.5                         | 1.0                         |
| Pt-Sn/ $\gamma$ -Al <sub>2</sub> O <sub>3</sub> + Al <sub>2</sub> O <sub>3</sub> | 27.7           | 4.3             | 5.6            | 0.4                         | 80.5                        | 3.5            | 4.9                         | 1.0                         |
| Pt-Sn/ $\gamma$ -Al <sub>2</sub> O <sub>3</sub> + ZrO <sub>2</sub>               | 30.3           | 7.0             | 8.2            | 0.5                         | 77.8                        | 2.6            | 3.2                         | 0.7                         |
| Pt-Sn/ $\gamma$ -Al <sub>2</sub> O <sub>3</sub> + TiO <sub>2</sub>               | 27.7           | 6.0             | 7.1            | 0.4                         | 75.8                        | 3.0            | 3.5                         | 4.2                         |

Final at 5.1 h

| Catalysts                                                                        | Conversion (%) | Selectivity (%) |                |                             |                             |                |                             |                             |
|----------------------------------------------------------------------------------|----------------|-----------------|----------------|-----------------------------|-----------------------------|----------------|-----------------------------|-----------------------------|
|                                                                                  |                | C <sub>1</sub>  | C <sub>2</sub> | C <sub>2</sub> <sup>=</sup> | C <sub>3</sub> <sup>=</sup> | C <sub>4</sub> | C <sub>4</sub> <sup>=</sup> | C <sub>5</sub> <sup>+</sup> |
| inert                                                                            | 0.3            | 8.8             | 10.8           | 16.4                        | 48.0                        | 16.1           | 0.0                         | 0.0                         |
| Al <sub>2</sub> O <sub>3</sub>                                                   | 1.1            | 17.7            | 0.7            | 28.8                        | 51.8                        | 0.0            | 1.0                         | 0.0                         |
| ZrO <sub>2</sub>                                                                 | 2.7            | 5.5             | 0.5            | 7.2                         | 86.9                        | 0.0            | 0.0                         | 0.0                         |
| TiO <sub>2</sub>                                                                 | 2.3            | 5.5             | 1.2            | 8.6                         | 84.7                        | 0.0            | 0.0                         | 0.0                         |
| Pt-Sn/ $\gamma$ -Al <sub>2</sub> O <sub>3</sub> + inert                          | 12.2           | 2.7             | 1.9            | 2.0                         | 89.4                        | 0.2            | 2.7                         | 1.2                         |
| Pt-Sn/ $\gamma$ -Al <sub>2</sub> O <sub>3</sub> + Al <sub>2</sub> O <sub>3</sub> | 12.5           | 3.2             | 1.9            | 2.3                         | 90.2                        | 0.1            | 2.0                         | 0.3                         |
| Pt-Sn/ $\gamma$ -Al <sub>2</sub> O <sub>3</sub> + ZrO <sub>2</sub>               | 24.1           | 1.8             | 2.1            | 0.5                         | 91.8                        | 0.5            | 2.0                         | 1.3                         |
| Pt-Sn/ $\gamma$ -Al <sub>2</sub> O <sub>3</sub> + TiO <sub>2</sub>               | 19.3           | 2.1             | 2.1            | 0.1                         | 90.6                        | 0.3            | 2.6                         | 1.3                         |

**Table S2** Textural properties of acidic nanomaterials

| Nanomaterials                  | BET surface area (m <sup>2</sup> . g <sup>-1</sup> ) | Pore size (nm) | Pore volume (cm <sup>3</sup> . g <sup>-1</sup> ) |
|--------------------------------|------------------------------------------------------|----------------|--------------------------------------------------|
| Al <sub>2</sub> O <sub>3</sub> | 123.5                                                | 12.7           | 0.54                                             |
| ZrO <sub>2</sub>               | 27.1                                                 | 18.9           | 0.14                                             |
| TiO <sub>2</sub>               | 37.3                                                 | 26.0           | 0.30                                             |

**Table S3** Amount of acidity of nanomaterials

| Nanomaterials           | Amount of acidity ( $\mu\text{mol NH}_3 \cdot \text{g cat}^{-1}$ ) |        |        |       |
|-------------------------|--------------------------------------------------------------------|--------|--------|-------|
|                         | Weak                                                               | Medium | Strong | Total |
| $\text{Al}_2\text{O}_3$ | 864                                                                | 1152   | 1283   | 3298  |
| $\text{ZrO}_2$          | 130                                                                | 181    | 834    | 1149  |
| $\text{TiO}_2$          | 175                                                                | 1099   | 916    | 2191  |

**Table S4** CO-chemisorption of the Pt-Sn/ $\gamma$ - $\text{Al}_2\text{O}_3$  catalyst with acidic nanomaterials

| Catalysts                                                           | Amount of CO adsorbed<br>( $\mu\text{mol CO} \cdot \text{g cat}^{-1}$ ) | Pt dispersion<br>(%) |
|---------------------------------------------------------------------|-------------------------------------------------------------------------|----------------------|
| Pt-Sn/ $\gamma$ - $\text{Al}_2\text{O}_3$ + inert                   | 12.3                                                                    | 80.0                 |
| Pt-Sn/ $\gamma$ - $\text{Al}_2\text{O}_3$ + $\text{Al}_2\text{O}_3$ | 13.2                                                                    | 85.8                 |
| Pt-Sn/ $\gamma$ - $\text{Al}_2\text{O}_3$ + $\text{ZrO}_2$          | 14.2                                                                    | 92.3                 |
| Pt-Sn/ $\gamma$ - $\text{Al}_2\text{O}_3$ + $\text{TiO}_2$          | 15.0                                                                    | 97.5                 |

**Table S5**  $\text{O}_2$ -TPD results of acidic nanomaterials

| Nanomaterials           | $\text{O}_2$ -TPD peaks<br>position ( $^\circ\text{C}$ ) | $\text{O}_2$ desorption<br>( $\text{mmol O}_2 \cdot \text{g cat}^{-1}$ ) |
|-------------------------|----------------------------------------------------------|--------------------------------------------------------------------------|
| $\text{Al}_2\text{O}_3$ | 146                                                      | 0.44 ( $\text{O}_v$ )                                                    |
|                         | 368                                                      | 0.48                                                                     |
|                         | 654                                                      | 0.13                                                                     |
| $\text{ZrO}_2$          | 87                                                       | 0.56 ( $\text{O}_v$ )                                                    |
|                         | 267                                                      | 0.43                                                                     |
|                         | 529                                                      | 0.30                                                                     |
| $\text{TiO}_2$          | 165                                                      | 0.93 ( $\text{O}_v$ )                                                    |
|                         | 307                                                      | 0.02                                                                     |

**Table S6** XPS results of acidic nanomaterials

| Nanomaterials           | $\text{O}_v/\text{O}_L$ |
|-------------------------|-------------------------|
| $\text{Al}_2\text{O}_3$ | 0.63                    |
| $\text{ZrO}_2$          | 0.69                    |
| $\text{TiO}_2$          | 1.23                    |

**Table S7** Adsorption energy of propylene and propadiene on acidic nanomaterials by *in-situ* DSC

| Nanomaterials                  | Propylene<br>(J. g cat <sup>-1</sup> ) | Propadiene<br>(J. g cat <sup>-1</sup> ) |
|--------------------------------|----------------------------------------|-----------------------------------------|
| Al <sub>2</sub> O <sub>3</sub> | 1.03                                   | 5.07                                    |
| ZrO <sub>2</sub>               | 1.27                                   | 5.33                                    |
| TiO <sub>2</sub>               | 1.46                                   | 6.50                                    |

**Table S8** The summarized coke forms during the *in situ* DRIFT study of propadiene at different temperature

| Nanomaterials                  | Temp.<br>(°C) | Area of coke forms |            |           | Differentiation <sup>a</sup> |            |           |
|--------------------------------|---------------|--------------------|------------|-----------|------------------------------|------------|-----------|
|                                |               | C=C                | Aliphatics | Aromatics | C=C                          | Aliphatics | Aromatics |
| TiO <sub>2</sub>               | 40            | 1.22               | 0.036      | 0.01      | 1.00                         | 0.00       | 0.00      |
|                                | 100           | 1.02               | 0.048      | 0.03      | 0.84                         | 1.33       | 3.00      |
|                                | 200           | 0.32               | 0.02       | 0.31      | 0.26                         | 0.56       | 31.00     |
|                                | 300           | 0.07               | 0.011      | 4.67      | 0.06                         | 0.31       | 467.00    |
| ZrO <sub>2</sub>               | 40            | 3.49               | 0.12       | 0.08      | 1.00                         | 0.00       | 0.00      |
|                                | 100           | 3.47               | 0.17       | 0.11      | 0.99                         | 1.42       | 1.38      |
|                                | 200           | 0.76               | 0.16       | 1.56      | 0.22                         | 1.33       | 19.50     |
|                                | 300           | 0.05               | 0.08       | 8.5       | 0.01                         | 0.67       | 106.25    |
| Al <sub>2</sub> O <sub>3</sub> | 40            | 3.51               | 0.009      | 1.47      | 1.00                         | 0.00       | 0.00      |
|                                | 100           | 1.97               | 0.016      | 2.27      | 0.56                         | 1.78       | 1.54      |
|                                | 200           | 1.73               | 0.062      | 2.43      | 0.49                         | 6.89       | 1.65      |
|                                | 300           | 1.46               | 0.152      | 1.81      | 0.42                         | 16.89      | 1.23      |

<sup>a</sup> At 40 °C, there is no differentiation (initial = 1.00).

At elevated temperature, differentiation = area<sub>i at that temperature</sub> / area<sub>i at 40 °C</sub>

**Table S9** The summarized coke deposition and oxygen vacancies of different pretreated acidic nanomaterials

| Nanomaterials                         | O <sub>V</sub> /O <sub>L</sub> | Coke deposition on nanomaterials (%) |
|---------------------------------------|--------------------------------|--------------------------------------|
| Al <sub>2</sub> O <sub>3</sub> 500 °C | 0.63                           | N/A                                  |
| Al <sub>2</sub> O <sub>3</sub> 550 °C | 0.64                           | N/A                                  |
| Al <sub>2</sub> O <sub>3</sub> 600 °C | 0.64                           | N/A                                  |
| ZrO <sub>2</sub> 500 °C               | 0.69                           | 2.5                                  |
| ZrO <sub>2</sub> 550 °C               | 0.71                           | 2.5                                  |
| ZrO <sub>2</sub> 600 °C               | 0.70                           | 2.5                                  |
| TiO <sub>2</sub> 500 °C               | 1.23                           | 3.1                                  |
| TiO <sub>2</sub> 550 °C               | 1.39                           | 3.5                                  |
| TiO <sub>2</sub> 600 °C               | 1.41                           | 3.7                                  |
